# Supplementary material
Source: ML conference proceedings conference paper supplement (https://aclanthology.org/D19-1053)
Supplement: Attachment [file D19-1053.Attachment.pdf]

## A Supplemental Material

### A.1 Proofs

In this section, we prove the Prop. 1 in the paper about viewing BERTScore (precision/recall) as a (non-optimized) Mover Distance.

As a reminder, WMD formulates as:

$$\text{WMD}(\mathbf{x}^n, \mathbf{y}^n) := \min_{F \in \mathbb{R}^{|\mathbf{x}^n| \times |\mathbf{y}^n|}} \sum_i \sum_j C_{ij} \cdot F_{ij}$$

$$\text{s.t. } \mathbf{1}^\top F \mathbf{1} = 1, \quad \mathbf{1}^\top F \mathbf{1} = 1.$$

where  $F^\top \mathbf{1} = \mathbf{f}_x^n$  and  $F \mathbf{1} = \mathbf{f}_y^n$  denote a vector of weights for each  $n$ -gram of  $\mathbf{x}^n$  and  $\mathbf{y}^n$ .

The BERTScore is defined as:

$$R_{\text{BERT}} = \frac{\sum_{y_i^1 \in \mathbf{y}^1} \text{idf}(y_i^1) \max_{x_j^1 \in \mathbf{x}^1} E(x_j^1)^\top E(y_i^1)}{\sum_{y_i^1 \in \mathbf{y}^1} \text{idf}(y_i^1)}$$

$$P_{\text{BERT}} = \frac{\sum_{x_j^1 \in \mathbf{x}^1} \text{idf}(x_j^1) \max_{y_i^1 \in \mathbf{y}^1} E(y_i^1)^\top E(x_j^1)}{\sum_{x_j^1 \in \mathbf{x}^1} \text{idf}(x_j^1)}$$

$$F_{\text{BERT}} = 2 \frac{P_{\text{BERT}} \cdot R_{\text{BERT}}}{P_{\text{BERT}} + R_{\text{BERT}}}.$$

Then,  $R_{\text{BERT}}$  can be formulated in a ‘‘quasi’’ WMD form:

$$R_{\text{BERT}}(\mathbf{x}^1, \mathbf{y}^1) := \sum_{i,j} C_{ij} \cdot F_{ij}$$

$$F_{ij} = \begin{cases} \frac{1}{M} & \text{if } x_j = \arg \max_{\hat{x}_j^1 \in \mathbf{x}^1} E(y_i^1)^\top E(\hat{x}_j^1) \\ 0 & \text{otherwise} \end{cases}$$

$$C_{ij} = \begin{cases} \frac{M}{Z} \text{idf}(y_i^1) E(x_j^1)^\top E(y_i^1) & \text{if } x_j = \arg \max_{\hat{x}_j^1 \in \mathbf{x}^1} E(y_i^1)^\top E(\hat{x}_j^1) \\ 0 & \text{otherwise} \end{cases}$$

where  $Z = \sum_{y_i^1 \in \mathbf{y}^1} \text{idf}(y_i^1)$  and  $M$  is the size of  $n$ -grams in  $\mathbf{x}^1$ . Similarly, we can have  $P_{\text{BERT}}$  in a quasi WMD form (ignored). Then,  $F_{\text{BERT}}$  can be formulated as harmonic-mean of two WMD forms of  $P_{\text{BERT}}$  and  $R_{\text{BERT}}$ .

### A.2 Routing

In this section, we study the aggregation function  $\phi$  with routing scheme, which achieved promising results on NLP tasks. Specifically, we introduce a nonparametric clustering with Kernel Density Estimation (KDE) for routing since KDE bridges a family of kernel functions with underlying empirical distributions, which often leads to computational efficiency (Zhang et al., 2018), defined as:

$$\min_{\mathbf{v}, \gamma} f(\mathbf{z}) = \sum_{i=1}^L \sum_{j=1}^T \gamma_{ij} k(d(\mathbf{v}_j - \mathbf{z}_{i,j}))$$

$$\text{s.t. } \forall i, j : \gamma_{ij} > 0, \sum_{j=1}^L \gamma_{ij} = 1.$$

where  $d(\cdot)$  is a distance function,  $\gamma_{ij}$  denotes underlying closeness between the aggregated vector  $\mathbf{v}_j$  and vector  $\mathbf{z}_i$  in the  $i$ -th layer, some instances of  $k(\cdot)$  (Wand and Jones, 1994) can be illustrated as:

$$\text{Gaussian} : k(x) \triangleq \exp\left(-\frac{x}{2}\right), \quad \text{Epanechnikov} : k(x) \triangleq \begin{cases} 1-x & x \in [0, 1) \\ 0 & x \geq 1. \end{cases}$$

One typical solution for KDE clustering to minimize  $f(\mathbf{z})$  is taking Mean Shift (Comaniciu and Meer, 2002), defined as:

$$\nabla f(\mathbf{z}) = \sum_{i,j} \gamma_{ij} k'(d(\mathbf{v}_j, \mathbf{z}_{i,j})) \frac{\partial d(\mathbf{v}_j, \mathbf{z}_{i,j})}{\partial \mathbf{v}}$$

Firstly,  $\mathbf{v}_j^{\tau+1}$  can be updated while  $c_{ij}^{\tau+1}$  is fixed:

$$\mathbf{v}_j^{\tau+1} = \frac{\sum_i \gamma_{ij}^{\tau} k'(d(\mathbf{v}_j^{\tau}, \mathbf{z}_{i,j})) \mathbf{z}_{i,j}}{\sum_{i,j} k'(d(\mathbf{v}_j^{\tau}, \mathbf{z}_{i,j}))}$$

Intuitively,  $\mathbf{v}_j$  can be explained as a final aggregated vector from  $L$  contextualized layers. Then, we adopt SGD to update  $\gamma_{ij}^{\tau+1}$ :

$$\gamma_{ij}^{\tau+1} = \gamma_{ij}^{\tau} + \alpha \cdot k(d(\mathbf{v}_j^{\tau}, \mathbf{z}_{i,j}))$$

where  $\alpha$  is the hyper parameter to control step size. The routing process is summarized in Algorithm 1.

---

**Algorithm 1** Aggregation by Routing

---

```

1: procedure ROUTING( $\mathbf{z}_{ij}, \ell$ )
2: Initialize  $\forall i, j : \gamma_{ij} = 0$ 
3: while true do
4:   foreach representation  $i$  and  $j$  in layer  $\ell$  and  $\ell + 1$  do  $\gamma_{ij} \leftarrow \text{softmax}(\gamma_{ij})$ 
5:   foreach representation  $j$  in layer  $\ell + 1$  do
6:      $\mathbf{v}_j \leftarrow \sum_i \gamma_{ij} k'(d(\mathbf{v}_j, \mathbf{z}_i)) \mathbf{z}_i / \sum_i k'(d(\mathbf{v}_j, \mathbf{z}_i))$ 
7:   foreach representation  $i$  and  $j$  in layer  $\ell$  and  $\ell + 1$  do  $\gamma_{ij} \leftarrow \gamma_{ij} + \alpha \cdot k(d(\mathbf{v}_j, \mathbf{z}_i))$ 
8:   loss  $\leftarrow \log(\sum_{i,j} \gamma_{ij} k(d(\mathbf{v}_j, \mathbf{z}_i)))$ 
9:   if  $|\text{loss} - \text{preloss}| < \epsilon$  then
10:    break
11:  else
12:    preloss  $\leftarrow$  loss
13: return  $\mathbf{v}_j$ 

```

---

**Best Layer and Layer-wise Consolidation** Table 6 compares our Word Mover based metric combining BERT representations on different layers with stronger BERT representations consolidated from these layers ( $p$ -means and routing). We often see that which layer has best performance is task-dependent, and our WMD-based metrics with  $p$ -means or routing schema come close to the oracle performance obtained from best layers.

| Metrics                 | Direct Assessment |              |              |              |              |              |              |
|-------------------------|-------------------|--------------|--------------|--------------|--------------|--------------|--------------|
|                         | cs-en             | de-en        | fi-en        | lv-en        | ru-en        | tr-en        | zh-en        |
| WMD-1 + BERT + LAYER 8  | .6361             | .6755        | .8134        | .7033        | .7273        | .7233        | .7175        |
| WMD-1 + BERT + LAYER 9  | .6510             | .6865        | .8240        | .7107        | .7291        | <b>.7357</b> | <b>.7195</b> |
| WMD-1 + BERT + LAYER 10 | .6605             | <b>.6948</b> | <b>.8231</b> | .7158        | <b>.7363</b> | .7317        | .7168        |
| WMD-1 + BERT + LAYER 11 | <b>.6695</b>      | .6845        | .8192        | .7048        | .7315        | .7276        | .7058        |
| WMD-1 + BERT + LAYER 12 | .6677             | .6825        | .8194        | <b>.7188</b> | .7326        | .7291        | .7064        |
| WMD-1 + BERT + ROUTING  | .6618             | .6897        | .8225        | .7122        | .7334        | .7301        | .7182        |
| WMD-1 + BERT + PMEANS   | .6623             | .6873        | .8234        | .7139        | .7350        | .7339        | .7192        |

Table 6: Absolute Pearson correlations with segment-level human judgments on WMT17 to-English translations.

**Experiments** Table 7, 8 and 9 show correlations between metrics (all baseline metrics and Word Mover based metrics) and human judgments on machine translation, text summarization and dialogue response generation tasks.

| Setting          | Metrics                       | Direct Assessment |       |       |       |       |       |       |         |
|------------------|-------------------------------|-------------------|-------|-------|-------|-------|-------|-------|---------|
|                  |                               | cs-en             | de-en | fi-en | lv-en | ru-en | tr-en | zh-en | Average |
| Existing Metrics | BLEND                         | 0.594             | 0.571 | 0.733 | 0.594 | 0.622 | 0.671 | 0.661 | 0.635   |
|                  | RUSE                          | 0.624             | 0.644 | 0.750 | 0.697 | 0.673 | 0.716 | 0.691 | 0.685   |
|                  | SENTBLEU                      | 0.435             | 0.432 | 0.571 | 0.393 | 0.484 | 0.538 | 0.512 | 0.481   |
|                  | CHRF++                        | 0.523             | 0.534 | 0.678 | 0.520 | 0.588 | 0.614 | 0.593 | 0.579   |
|                  | METEOR++                      | 0.552             | 0.538 | 0.720 | 0.563 | 0.627 | 0.626 | 0.646 | 0.610   |
|                  | BERTSCORE-F1                  | 0.670             | 0.686 | 0.820 | 0.710 | 0.729 | 0.714 | 0.704 | 0.719   |
| Word-Mover       | WMD-1 + W2V                   | 0.392             | 0.463 | 0.558 | 0.463 | 0.456 | 0.485 | 0.481 | 0.471   |
|                  | WMD-1 + BERT + ROUTING        | 0.658             | 0.689 | 0.823 | 0.712 | 0.733 | 0.730 | 0.718 | 0.723   |
|                  | WMD-1 + BERT + MNLI + ROUTING | 0.665             | 0.705 | 0.834 | 0.744 | 0.735 | 0.752 | 0.736 | 0.739   |
|                  | WMD-2 + BERT + MNLI + ROUTING | 0.676             | 0.706 | 0.831 | 0.743 | 0.734 | 0.755 | 0.732 | 0.740   |
|                  | WMD-1 + BERT + PMEANS         | 0.662             | 0.687 | 0.823 | 0.714 | 0.735 | 0.734 | 0.719 | 0.725   |
|                  | WMD-1 + BERT + MNLI + PMEANS  | 0.670             | 0.708 | 0.835 | 0.746 | 0.738 | 0.762 | 0.744 | 0.743   |
|                  | WMD-2 + BERT + MNLI + PMEANS  | 0.679             | 0.710 | 0.832 | 0.745 | 0.736 | 0.763 | 0.740 | 0.743   |

Table 7: Absolute Pearson correlations with segment-level human judgments on WMT17 to-English translations.

| Setting          | Metrics                       | TAC-2008       |        |         |        | TAC-2009       |        |         |        |
|------------------|-------------------------------|----------------|--------|---------|--------|----------------|--------|---------|--------|
|                  |                               | Responsiveness |        | Pyramid |        | Responsiveness |        | Pyramid |        |
|                  |                               | $r$            | $\rho$ | $r$     | $\rho$ | $r$            | $\rho$ | $r$     | $\rho$ |
| Existing Metrics | $S_{full}^3$                  | 0.696          | 0.558  | 0.753   | 0.652  | 0.731          | 0.552  | 0.838   | 0.724  |
|                  | $S_{best}^3$                  | 0.715          | 0.595  | 0.754   | 0.652  | 0.738          | 0.595  | 0.842   | 0.731  |
|                  | TF*IDF-1                      | 0.176          | 0.224  | 0.183   | 0.237  | 0.187          | 0.222  | 0.242   | 0.284  |
|                  | TF*IDF-2                      | 0.047          | 0.154  | 0.049   | 0.182  | 0.047          | 0.167  | 0.097   | 0.233  |
|                  | ROUGE-1                       | 0.703          | 0.578  | 0.747   | 0.632  | 0.704          | 0.565  | 0.808   | 0.692  |
|                  | ROUGE-2                       | 0.695          | 0.572  | 0.718   | 0.635  | 0.727          | 0.583  | 0.803   | 0.694  |
|                  | ROUGE-1-WE                    | 0.571          | 0.450  | 0.579   | 0.458  | 0.586          | 0.437  | 0.653   | 0.516  |
|                  | ROUGE-2-WE                    | 0.566          | 0.397  | 0.556   | 0.388  | 0.607          | 0.413  | 0.671   | 0.481  |
|                  | ROUGE-L                       | 0.681          | 0.520  | 0.702   | 0.568  | 0.730          | 0.563  | 0.779   | 0.652  |
|                  | FRAME-1                       | 0.658          | 0.508  | 0.686   | 0.529  | 0.678          | 0.527  | 0.762   | 0.628  |
|                  | FRAME-2                       | 0.676          | 0.519  | 0.691   | 0.556  | 0.715          | 0.555  | 0.781   | 0.648  |
|                  | BERTSCORE-F1                  | 0.724          | 0.594  | 0.750   | 0.649  | 0.739          | 0.580  | 0.823   | 0.703  |
| Word-Mover       | WMD-1 + W2V                   | 0.669          | 0.559  | 0.665   | 0.611  | 0.698          | 0.520  | 0.740   | 0.647  |
|                  | WMD-1 + BERT + ROUTING        | 0.729          | 0.601  | 0.763   | 0.675  | 0.740          | 0.580  | 0.831   | 0.700  |
|                  | WMD-1 + BERT + MNLI + ROUTING | 0.734          | 0.609  | 0.768   | 0.686  | 0.747          | 0.589  | 0.837   | 0.711  |
|                  | WMD-2 + BERT + MNLI + ROUTING | 0.731          | 0.593  | 0.755   | 0.666  | 0.753          | 0.583  | 0.827   | 0.698  |
|                  | WMD-1 + BERT + PMEANS         | 0.729          | 0.595  | 0.755   | 0.660  | 0.742          | 0.581  | 0.825   | 0.690  |
|                  | WMD-1 + BERT + MNLI + PMEANS  | 0.736          | 0.604  | 0.760   | 0.672  | 0.754          | 0.594  | 0.831   | 0.701  |
|                  | WMD-2 + BERT + MNLI + PMEANS  | 0.734          | 0.601  | 0.752   | 0.663  | 0.753          | 0.586  | 0.825   | 0.694  |

Table 8: Correlation of automatic metrics with summary-level human judgments for TAC-2008 and TAC-2009.

| Setting          | Metrics                       | BAGEL |       |       | SFHOTEL |       |       |
|------------------|-------------------------------|-------|-------|-------|---------|-------|-------|
|                  |                               | Inf   | Nat   | Qual  | Inf     | Nat   | Qual  |
| Existing Metrics | BLEU-1                        | 0.225 | 0.141 | 0.113 | 0.107   | 0.175 | 0.069 |
|                  | BLEU-2                        | 0.211 | 0.152 | 0.115 | 0.097   | 0.174 | 0.071 |
|                  | BLEU-3                        | 0.191 | 0.150 | 0.109 | 0.089   | 0.161 | 0.070 |
|                  | BLEU-4                        | 0.175 | 0.141 | 0.101 | 0.084   | 0.104 | 0.056 |
|                  | ROUGE-L                       | 0.202 | 0.134 | 0.111 | 0.092   | 0.147 | 0.062 |
|                  | NIST                          | 0.207 | 0.089 | 0.056 | 0.072   | 0.125 | 0.061 |
|                  | CIDER                         | 0.205 | 0.162 | 0.119 | 0.095   | 0.155 | 0.052 |
|                  | METEOR                        | 0.251 | 0.127 | 0.116 | 0.111   | 0.148 | 0.082 |
|                  | BERTSCORE-F1                  | 0.267 | 0.210 | 0.178 | 0.163   | 0.193 | 0.118 |
| Word-WMD         | WMD-1 + W2V                   | 0.222 | 0.079 | 0.123 | 0.074   | 0.095 | 0.021 |
|                  | WMD-1 + BERT + ROUTING        | 0.294 | 0.209 | 0.156 | 0.208   | 0.256 | 0.178 |
|                  | WMD-1 + BERT + MNLI + ROUTING | 0.278 | 0.180 | 0.144 | 0.211   | 0.252 | 0.175 |
|                  | WMD-2 + BERT + MNLI + ROUTING | 0.279 | 0.182 | 0.147 | 0.204   | 0.252 | 0.172 |
|                  | WMD-1 + BERT + PMEANS         | 0.298 | 0.212 | 0.163 | 0.203   | 0.261 | 0.182 |
|                  | WMD-1 + BERT + MNLI + PMEANS  | 0.285 | 0.195 | 0.158 | 0.207   | 0.270 | 0.183 |
|                  | WMD-2 + BERT + MNLI + PMEANS  | 0.284 | 0.194 | 0.156 | 0.204   | 0.270 | 0.182 |

Table 9: Spearman correlation with utterance-level human judgments for BAGEL and SFHOTEL datasets.
